# Supplementary material for: Reorienting Mechanism of Harderoheme in Coproheme Decarboxylase—A Computational Study
Source: MDPI journal article supplement (doi:10.3390/ijms23052564), 2022-02-25
Supplement: s1 [file s1]

# Reorienting mechanism of harderoheme in coproheme decarboxylase - a computational study

Wei Liu<sup>1</sup>, Yunjie Pang<sup>1</sup>, Yutian Song<sup>1</sup>, Hongwei Tan<sup>1,\*</sup>, Xichen Li<sup>1,\*</sup>, Guangju Chen<sup>1,\*</sup>

<sup>1</sup>Key Laboratory of Theoretical and Computational Photochemistry, Ministry of Education, College of Chemistry, Beijing Normal University, Beijing 100875, China;

201731150027@mail.bnu.edu.cn (W.L.); pangyunjie66@hotmail.com (Y.P.);

202021150073@mail.bnu.edu.cn (Y.S.); xcli@bnu.edu.cn (X.L.)

\* Correspondence: hongwei.tan@bnu.edu.cn (H.T.); gjchen@bnu.edu.cn (G.C.)

## Section S1. Molecular Dynamics Simulation Protocols

The systems were minimized for six rounds with the positional restraints on the protein backbone gradually decreased as 100, 75, 50, 25, 10 and 0 kcal/(mol·Å<sup>2</sup>). 1200 steepest descent steps followed by 1800 conjugate gradient steps were performed for each of the minimization round [1]. Then, the system was gradually heated from 0 to 300 K under the NVT ensemble, for 120 ps with a 2 fs time step. Thirdly, the temperature of 300 K (NPT) was kept and an equilibration for 200 ps running time was carried out at a pressure of 1 bar of each model. During this procedure, Langevin thermostat [2] with collision frequency of 2 ps<sup>-1</sup> and Berendsen barostat [3] with pressure relaxation time of 1 ps were used to maintain the temperature and density of the system. During all the MD and TMD simulations, Particle Mesh Ewald (PME) [4] method with a cutoff distance of 10 Å for nonbonded interactions was used. The SHAKE [5] method was utilized to constrain the covalent bonds associated with the hydrogen atoms within the system. 24 Na<sup>+</sup> and 11 Cl<sup>-</sup> counterions were added to achieve electroneutrality and to satisfy the experimental ionic strength of 50 mM for all models [6].

## **Section S2. MM-PBSA Calculations of Binding Free Energy**

Using the MM-PBSA method in single-trajectory by Amber20, the last 100 ns trajectory of each monomer models were used to calculate the binding free energy calculations between enzyme and coproheme, namely, the 500 snapshots of each model at a 10-ps interval for computation. The energy decompositions of each residue in our models were performed on the molecular mechanics [7], solvation free energies without consideration of entropy calculations.

## **Section S3. Entropy Correction Calculation of Reorientation Process**

Based on the energy curve calculated for the harderoheme reorientation process (the detail for energy curve calculation is provided in the main text, section 3.5), we identified the stationary points including the highest peak of each transition stages and the minimal point of each intermediate stages. Since each of these stationary points on the energy curve is averaged from a 1 ns trajectory, 20 frames were therefore extracted from the corresponding 1ns trajectory for entropy calculation by using MM-PBSA method. The obtained statistical average entropy was used to obtain the corresponding free energy for each of the stationary points as listed in Table S4.

## **Section S4. Parameters of Coproheme and Harderoheme**

The force field parameters of heme (all-atom, include  $\text{Fe}^{3+}$  ion) were obtained from AMBER parameter database (<http://amber.manchester.ac.uk/>), which were developed by Giammona and modified for all-atom heme. Based on the parameters of propionate p6 and p7 in heme, we fitted the force field parameters for p2 and p4. The atomic charges of coproheme and harderoheme were assigned by using AM1-BCC method embedded in Antechamber module of Ambertools package [8-10]. The parameters files are given as follow:

**The parameters of coproheme and harderoheme:**

**\*.frcomd**  
MASS

NP 14.01  
 NO 14.01  
 CY 12.0  
 CX 12.0  
 CD 12.0  
 FE 55.85  
 LC 12.01  
 LO 16.00

#### BOND

|       |          |         |                   |
|-------|----------|---------|-------------------|
| FE-NP | 50.000   | 2.01000 |                   |
| FE-LO | 200.000  | 1.78    |                   |
| FE-LC | 200.000  | 1.75000 |                   |
| LC-LO | 1000.000 | 1.12000 |                   |
| FE-NB | 60.000   | 2.01000 |                   |
| FE-NO | 50.000   | 2.01000 |                   |
| NP-CC | 316.000  | 1.38400 |                   |
| NO-CC | 316.000  | 1.38400 |                   |
| CC-CB | 273.000  | 1.44400 |                   |
| CC-CD | 391.000  | 1.39100 |                   |
| CB-CB | 418.000  | 1.35700 |                   |
| CB-CT | 297.000  | 1.50100 |                   |
| CB-CY | 297.000  | 1.50100 |                   |
| CD-HC | 338.000  | 1.09000 |                   |
| CY-HC | 340.000  | 1.08000 |                   |
| CX-HC | 340.000  | 1.08000 |                   |
| CY-CX | 570.000  | 1.34000 |                   |
| LO-LO | 848.000  | 1.25000 | unbound O2 ligand |

#### ANGLE

|          |        |        |
|----------|--------|--------|
| NB-FE-NP | 50.000 | 90.000 |
| NB-FE-NO | 50.000 | 90.000 |
| NB-FE-LC | 0.000  | 90.000 |
| NB-FE-LO | 0.000  | 90.000 |
| NP-FE-NP | 0.000  | 90.000 |
| NO-FE-NO | 0.000  | 90.000 |
| NO-FE-NP | 50.000 | 90.000 |
| NO-FE-LC | 45.000 | 90.000 |
| NO-FE-LO | 45.000 | 90.000 |
| NP-FE-LC | 45.000 | 90.000 |
| NP-FE-LO | 45.000 | 90.000 |

|          |         |         |
|----------|---------|---------|
| FE-NP-CC | 30.000  | 127.400 |
| FE-NO-CC | 30.000  | 127.400 |
| NO-CC-CB | 70.000  | 110.300 |
| NP-CC-CB | 70.000  | 110.300 |
| NO-CC-CD | 70.000  | 125.500 |
| NP-CC-CD | 70.000  | 125.500 |
| CC-NP-CC | 70.000  | 105.400 |
| CC-NO-CC | 70.000  | 105.400 |
| CC-CB-CB | 70.000  | 107.000 |
| CC-CD-CC | 70.000  | 124.100 |
| CB-CC-CD | 70.000  | 125.400 |
| CC-CB-CT | 70.000  | 124.900 |
| CB-CB-CT | 70.000  | 128.200 |
| CC-CD-HC | 30.000  | 118.000 |
| CR-NB-FE | 0.000   | 110.000 |
| CV-NB-FE | 0.000   | 110.000 |
| CB-CT-HC | 35.000  | 109.500 |
| CB-CB-CY | 70.000  | 128.200 |
| CB-CY-HC | 35.000  | 120.000 |
| CB-CY-CX | 70.000  | 120.000 |
| CY-CX-HC | 35.000  | 120.000 |
| CC-CB-CY | 70.000  | 124.900 |
| CX-CY-HC | 35.000  | 120.000 |
| CB-CT-CT | 63.000  | 114.000 |
| HC-CX-HC | 35.000  | 120.000 |
| FE-LC-LO | 35.000  | 180.000 |
| FE-LO-LO | 35.000  | 135.000 |
| LP-SH-LP | 600.000 | 160.000 |

#### DIHEDRAL

|            |   |        |         |       |
|------------|---|--------|---------|-------|
| X -NB-FE-X | 1 | 0.000  | 0.000   | 2.000 |
| X -NO-FE-X | 1 | 0.000  | 180.000 | 2.000 |
| X -NP-FE-X | 1 | 0.000  | 180.000 | 2.000 |
| X -NO-CC-X | 4 | 5.700  | 180.000 | 2.000 |
| X -NP-CC-X | 4 | 5.700  | 180.000 | 2.000 |
| X -CC-CB-X | 4 | 3.150  | 180.000 | 2.000 |
| X -CB-CB-X | 4 | 21.500 | 180.000 | 2.000 |
| X -CD-CC-X | 4 | 7.900  | 180.000 | 2.000 |
| X -CB-CT-X | 1 | 0.000  | 180.000 | 2.000 |
| X -CB-CY-X | 4 | 0.000  | 180.000 | 2.000 |
| X -CY-CX-X | 4 | 30.000 | 180.000 | 2.000 |

|            |   |     |       |     |
|------------|---|-----|-------|-----|
| X -FE-LO-X | 1 | 0.0 | 180.0 | 2.0 |
|------------|---|-----|-------|-----|

# IMPROPER

|            |   |       |         |       |
|------------|---|-------|---------|-------|
| X -X -CC-X | 0 | 1.000 | 180.000 | 2.000 |
| X -X -CB-X | 0 | 1.000 | 180.000 | 2.000 |
| X -X -NP-X | 0 | 1.000 | 180.000 | 2.000 |
| X -X -NO-X | 0 | 1.000 | 180.000 | 2.000 |

# NONBON

|    |         |         |         |      |
|----|---------|---------|---------|------|
| FE | 1.20000 | 0.05000 | 0.00000 |      |
| LO | 1.60000 | 0.20000 | 0.00000 |      |
| LC | 1.85    | 0.12    | 0.0     |      |
| NP | 1.8240  | 0.1700  |         | OPLS |
| NO | 1.8240  | 0.1700  |         | OPLS |

# Coproheme.prepin

0 0 2

This is a remark line

CEM.res

CEM INT 0

CORRECT OMIT DU BEG

0.0000

|    |      |    |   |    |    |    |        |          |          |           |
|----|------|----|---|----|----|----|--------|----------|----------|-----------|
| 1  | DUMM | DU | M | 0  | 0  | 0  | 0.0000 | 0.0000   | 0.0000   | .00000    |
| 2  | DUMM | DU | M | 1  | 0  | 0  | 1.4490 | 0.0000   | 0.0000   | .00000    |
| 3  | DUMM | DU | M | 2  | 1  | 0  | 1.5220 | 111.1000 | 0.0000   | .00000    |
| 19 | FE   | FE | M | 16 | 14 | 12 | 2.1000 | 124.0000 | 180.0000 | 0.070000  |
| 20 | NA   | NP | S | 19 | 16 | 14 | 2.0800 | 98.0000  | 90.0000  | -0.585300 |
| 21 | C1A  | CC | S | 20 | 19 | 16 | 1.3800 | 125.4000 | 90.0000  | 0.220600  |
| 22 | C2A  | CB | B | 21 | 20 | 19 | 1.4100 | 109.0000 | 180.0000 | -0.090200 |
| 23 | CAA  | CT | 3 | 22 | 21 | 20 | 1.5100 | 124.0000 | 180.0000 | -0.030200 |
| 24 | HP71 | HC | E | 23 | 22 | 21 | 1.0900 | 109.5000 | 60.0000  | 0.063700  |
| 25 | HP72 | HC | E | 23 | 22 | 21 | 1.0900 | 109.5000 | 300.0000 | 0.063700  |
| 26 | CBA  | CT | 3 | 23 | 22 | 21 | 1.5400 | 111.0000 | 180.0000 | -0.195400 |
| 27 | HP73 | HC | E | 26 | 23 | 22 | 1.0900 | 109.5000 | 60.0000  | 0.032700  |
| 28 | HP74 | HC | E | 26 | 23 | 22 | 1.0900 | 109.5000 | 300.0000 | 0.032700  |
| 29 | CGA  | C  | B | 26 | 23 | 22 | 1.5270 | 109.4000 | 180.0000 | 0.909600  |
| 30 | O1A  | O2 | E | 29 | 26 | 23 | 1.2600 | 117.2000 | 90.0000  | -0.848800 |
| 31 | O2A  | O2 | E | 29 | 26 | 23 | 1.2600 | 117.2000 | 270.0000 | -0.848800 |

|    |      |    |   |    |    |    |        |          |          |           |
|----|------|----|---|----|----|----|--------|----------|----------|-----------|
| 32 | C3A  | CB | B | 22 | 21 | 20 | 1.4100 | 107.0000 | 0.0000   | -0.188800 |
| 33 | CMA  | CT | 3 | 32 | 22 | 21 | 1.5100 | 125.0000 | 180.0000 | -0.081900 |
| 34 | HM81 | HC | E | 33 | 32 | 22 | 1.0900 | 109.5000 | 60.0000  | 0.074367  |
| 35 | HM82 | HC | E | 33 | 32 | 22 | 1.0900 | 109.5000 | 180.0000 | 0.074367  |
| 36 | HM83 | HC | E | 33 | 32 | 22 | 1.0900 | 109.5000 | 300.0000 | 0.074367  |
| 37 | C4A  | CC | S | 32 | 22 | 21 | 1.4100 | 107.0000 | 0.0000   | 0.535900  |
| 38 | CHB  | CD | B | 37 | 32 | 22 | 1.3700 | 127.0000 | 180.0000 | -0.151600 |
| 39 | HDM  | HC | E | 38 | 37 | 32 | 1.0800 | 120.0000 | 0.0000   | 0.159000  |
| 40 | C1B  | CC | B | 38 | 37 | 32 | 1.3700 | 127.0000 | 180.0000 | 0.132600  |
| 41 | NB   | NO | E | 40 | 38 | 37 | 1.3800 | 124.0000 | 0.0000   | -0.465300 |
| 42 | C3B  | CB | B | 40 | 38 | 37 | 1.4100 | 127.0000 | 180.0000 | -0.075200 |
| 43 | CAB  | CT | 3 | 42 | 40 | 38 | 1.5100 | 124.0000 | 180.0000 | -0.024200 |
| 44 | HP51 | HC | E | 43 | 42 | 40 | 1.0900 | 109.5000 | 60.0000  | 0.056200  |
| 45 | HP52 | HC | E | 43 | 42 | 40 | 1.0900 | 109.5000 | 300.0000 | 0.056200  |
| 46 | CBB  | CT | 3 | 43 | 42 | 40 | 1.5400 | 111.0000 | 180.0000 | -0.193400 |
| 47 | HP53 | HC | E | 46 | 43 | 42 | 1.0900 | 109.5000 | 60.0000  | 0.033200  |
| 48 | HP54 | HC | E | 46 | 43 | 42 | 1.0900 | 109.5000 | 300.0000 | 0.033200  |
| 49 | CGB  | C  | B | 46 | 43 | 42 | 1.5270 | 109.4000 | 180.0000 | 0.906600  |
| 50 | O1B  | O2 | E | 49 | 46 | 43 | 1.2600 | 117.2000 | 90.0000  | -0.852300 |
| 51 | O2B  | O2 | E | 49 | 46 | 43 | 1.2600 | 117.2000 | 270.0000 | -0.852300 |
| 52 | C2B  | CB | B | 42 | 40 | 38 | 1.4100 | 107.0000 | 180.0000 | -0.213800 |
| 53 | CMB  | CT | 3 | 52 | 42 | 40 | 1.5100 | 125.0000 | 0.0000   | -0.071900 |
| 54 | HM11 | HC | E | 53 | 43 | 42 | 1.0900 | 109.5000 | 60.0000  | 0.065367  |
| 55 | HM12 | HC | E | 53 | 52 | 42 | 1.0900 | 109.5000 | 180.0000 | 0.065367  |
| 56 | HM13 | HC | E | 53 | 52 | 42 | 1.0900 | 109.5000 | 300.0000 | 0.065367  |
| 57 | C4B  | CC | S | 52 | 42 | 40 | 1.4100 | 107.0000 | 0.0000   | 0.445900  |
| 58 | CHC  | CD | B | 53 | 52 | 42 | 1.3700 | 127.0000 | 180.0000 | -0.049600 |
| 59 | HAM  | HC | E | 58 | 57 | 52 | 1.0800 | 120.0000 | 0.0000   | 0.157000  |
| 60 | C1C  | CC | B | 58 | 57 | 52 | 1.3700 | 130.0000 | 180.0000 | 0.060600  |
| 61 | NC   | NP | E | 60 | 58 | 57 | 1.3800 | 124.0000 | 0.0000   | -0.478300 |
| 62 | C3C  | CB | B | 60 | 58 | 57 | 1.4100 | 127.0000 | 180.0000 | -0.044200 |
| 63 | CAC  | CT | 3 | 62 | 60 | 58 | 1.5100 | 124.0000 | 180.0000 | -0.028200 |
| 64 | HP81 | HC | E | 63 | 62 | 60 | 1.0900 | 109.5000 | 60.0000  | 0.059200  |
| 65 | HP82 | HC | E | 63 | 62 | 60 | 1.0900 | 109.5000 | 300.0000 | 0.059200  |
| 66 | CBC  | CT | 3 | 63 | 62 | 60 | 1.5400 | 111.0000 | 180.0000 | -0.194400 |
| 67 | HP83 | HC | E | 66 | 63 | 62 | 1.0900 | 109.5000 | 60.0000  | 0.033700  |
| 68 | HP84 | HC | E | 66 | 63 | 62 | 1.0900 | 109.5000 | 300.0000 | 0.033700  |
| 69 | CGC  | C  | B | 66 | 63 | 62 | 1.5270 | 109.4000 | 180.0000 | 0.906600  |
| 70 | O1C  | O2 | E | 69 | 66 | 63 | 1.2600 | 117.2000 | 90.0000  | -0.851300 |
| 71 | O2C  | O2 | E | 69 | 66 | 63 | 1.2600 | 117.2000 | 270.0000 | -0.851300 |
| 72 | C2C  | CB | B | 62 | 60 | 58 | 1.4100 | 107.0000 | 180.0000 | -0.225800 |

|    |      |    |   |    |    |    |        |          |          |           |
|----|------|----|---|----|----|----|--------|----------|----------|-----------|
| 73 | CMC  | CT | 3 | 72 | 62 | 60 | 1.5100 | 125.0000 | 0.0000   | -0.068900 |
| 74 | HM31 | HC | E | 73 | 63 | 62 | 1.0900 | 109.5000 | 60.0000  | 0.061367  |
| 75 | HM32 | HC | E | 73 | 72 | 62 | 1.0900 | 109.5000 | 180.0000 | 0.061367  |
| 76 | HM33 | HC | E | 73 | 72 | 62 | 1.0900 | 109.5000 | 300.0000 | 0.061367  |
| 77 | C4C  | CC | S | 72 | 62 | 60 | 1.4100 | 107.0000 | 0.0000   | 0.381900  |
| 78 | CHD  | CD | B | 73 | 72 | 62 | 1.3700 | 127.0000 | 180.0000 | -0.018600 |
| 79 | HBM  | HC | E | 78 | 77 | 72 | 1.0800 | 120.0000 | 0.0000   | 0.166000  |
| 80 | C1D  | CC | B | 78 | 77 | 72 | 1.3700 | 130.0000 | 180.0000 | 0.079600  |
| 81 | ND   | NO | E | 80 | 78 | 77 | 1.3800 | 124.0000 | 0.0000   | -0.465300 |
| 82 | C2D  | CB | B | 80 | 78 | 77 | 1.4100 | 127.0000 | 180.0000 | -0.014200 |
| 83 | CMD  | CT | 3 | 82 | 80 | 78 | 1.5100 | 125.0000 | 0.0000   | -0.061900 |
| 84 | HM51 | HC | E | 83 | 82 | 80 | 1.0900 | 109.5000 | 60.0000  | 0.067367  |
| 85 | HM52 | HC | E | 83 | 82 | 80 | 1.0900 | 109.5000 | 180.0000 | 0.067367  |
| 86 | HM53 | HC | E | 83 | 82 | 80 | 1.0900 | 109.5000 | 300.0000 | 0.067367  |
| 87 | C3D  | CB | B | 82 | 80 | 78 | 1.4100 | 107.0000 | 180.0000 | -0.186800 |
| 88 | C4D  | CC | S | 87 | 82 | 80 | 1.4100 | 107.0000 | 0.0000   | 0.677900  |
| 89 | CHA  | CD | S | 88 | 87 | 82 | 1.3700 | 127.0000 | 180.0000 | -0.268600 |
| 90 | HGM  | HC | E | 89 | 88 | 87 | 1.0800 | 120.0000 | 0.0000   | 0.193000  |
| 91 | CAD  | CT | 3 | 87 | 82 | 80 | 1.5100 | 124.0000 | 180.0000 | -0.029200 |
| 92 | HP61 | HC | E | 91 | 87 | 82 | 1.0900 | 109.5000 | 60.0000  | 0.082200  |
| 93 | HP62 | HC | E | 91 | 87 | 82 | 1.0900 | 109.5000 | 300.0000 | 0.082200  |
| 94 | CBD  | CT | 3 | 91 | 87 | 82 | 1.5400 | 111.0000 | 180.0000 | -0.206400 |
| 95 | HP63 | HC | E | 94 | 91 | 87 | 1.0900 | 109.5000 | 60.0000  | 0.025200  |
| 96 | HP64 | HC | E | 94 | 91 | 87 | 1.0900 | 109.5000 | 300.0000 | 0.025200  |
| 97 | CGD  | C  | B | 94 | 91 | 87 | 1.5300 | 109.4000 | 180.0000 | 0.913600  |
| 98 | O1D  | O2 | E | 97 | 94 | 91 | 1.2600 | 117.2000 | 90.0000  | -0.839800 |
| 99 | O2D  | O2 | E | 97 | 94 | 91 | 1.2600 | 117.2000 | 270.0000 | -0.839800 |

LOOP EXPLICIT

NA C4A  
 FE NB  
 FE NC  
 FE ND  
 NB C4B  
 NC C4C  
 ND C4D  
 C1A CHA

IMPROPER

NA C1A C4A FE  
 NB C1B C4B FE

|     |     |     |     |
|-----|-----|-----|-----|
| NC  | C1C | C4C | FE  |
| ND  | C1D | C4D | FE  |
| C1A | C2A | NA  | CHA |
| C1B | C2B | NB  | CHB |
| C1C | C2C | NC  | CHC |
| C1D | C2D | ND  | CHD |
| C2A | C3A | C1A | CAA |
| C2B | C3B | C1B | CMB |
| C2C | C3C | C1C | CMC |
| C2D | C3D | C1D | CMD |
| C3A | C4A | C2A | CMA |
| C3B | C4B | C2B | CAB |
| C3C | C4C | C2C | CAC |
| C3D | C4D | C2D | CAD |
| C4A | NA  | C3A | CHB |
| C4B | NB  | C3B | CHC |
| C4C | NC  | C3C | CHD |
| C4D | ND  | C3D | CHA |

DONE

STOP

### Harderoheme.prepin

0 0 2

This is a remark line

HEM.res

HEM INT 0

CORRECT OMIT DU BEG

0.0000

|    |      |    |   |    |    |    |        |          |          |           |
|----|------|----|---|----|----|----|--------|----------|----------|-----------|
| 1  | DUMM | DU | M | 0  | 0  | 0  | 0.0000 | 0.0000   | 0.0000   | .00000    |
| 2  | DUMM | DU | M | 1  | 0  | 0  | 1.4490 | 0.0000   | 0.0000   | .00000    |
| 3  | DUMM | DU | M | 2  | 1  | 0  | 1.5220 | 111.1000 | 0.0000   | .00000    |
| 19 | FE   | FE | M | 16 | 14 | 12 | 2.1000 | 124.0000 | 180.0000 | 0.046000  |
| 20 | NA   | NP | S | 19 | 16 | 14 | 2.0800 | 98.0000  | 90.0000  | -0.552300 |
| 21 | C1A  | CC | S | 20 | 19 | 16 | 1.3800 | 125.4000 | 90.0000  | 0.155600  |
| 22 | C2A  | CB | B | 21 | 20 | 19 | 1.4100 | 109.0000 | 180.0000 | -0.053200 |
| 23 | CAA  | CT | 3 | 22 | 21 | 20 | 1.5100 | 124.0000 | 180.0000 | -0.030200 |
| 24 | HP71 | HC | E | 23 | 22 | 21 | 1.0900 | 109.5000 | 60.0000  | 0.061200  |
| 25 | HP72 | HC | E | 23 | 22 | 21 | 1.0900 | 109.5000 | 300.0000 | 0.061200  |
| 26 | CBA  | CT | 3 | 23 | 22 | 21 | 1.5400 | 111.0000 | 180.0000 | -0.199400 |

|    |      |    |   |    |    |    |        |          |          |           |
|----|------|----|---|----|----|----|--------|----------|----------|-----------|
| 27 | HP73 | HC | E | 26 | 23 | 22 | 1.0900 | 109.5000 | 60.0000  | 0.035200  |
| 28 | HP74 | HC | E | 26 | 23 | 22 | 1.0900 | 109.5000 | 300.0000 | 0.035200  |
| 29 | CGA  | C  | B | 26 | 23 | 22 | 1.5270 | 109.4000 | 180.0000 | 0.909600  |
| 30 | O1A  | O2 | E | 29 | 26 | 23 | 1.2600 | 117.2000 | 90.0000  | -0.838300 |
| 31 | O2A  | O2 | E | 29 | 26 | 23 | 1.2600 | 117.2000 | 270.0000 | -0.838300 |
| 32 | C3A  | CB | B | 22 | 21 | 20 | 1.4100 | 107.0000 | 0.0000   | -0.239800 |
| 33 | CMA  | CT | 3 | 32 | 22 | 21 | 1.5100 | 125.0000 | 180.0000 | -0.039900 |
| 34 | HM81 | HC | E | 33 | 32 | 22 | 1.0900 | 109.5000 | 60.0000  | 0.050700  |
| 35 | HM82 | HC | E | 33 | 32 | 22 | 1.0900 | 109.5000 | 180.0000 | 0.050700  |
| 36 | HM83 | HC | E | 33 | 32 | 22 | 1.0900 | 109.5000 | 300.0000 | 0.050700  |
| 37 | C4A  | CC | S | 32 | 22 | 21 | 1.4100 | 107.0000 | 0.0000   | 0.495900  |
| 38 | CHB  | CD | B | 37 | 32 | 22 | 1.3700 | 127.0000 | 180.0000 | -0.094600 |
| 39 | HDM  | HC | E | 38 | 37 | 32 | 1.0800 | 120.0000 | 0.0000   | 0.169000  |
| 40 | C1B  | CC | B | 38 | 37 | 32 | 1.3700 | 127.0000 | 180.0000 | 0.087600  |
| 41 | NB   | NO | E | 40 | 38 | 37 | 1.3800 | 124.0000 | 0.0000   | -0.475300 |
| 42 | C3B  | CB | B | 40 | 38 | 37 | 1.4100 | 127.0000 | 180.0000 | -0.037200 |
| 43 | CAB  | CT | 3 | 42 | 40 | 38 | 1.5100 | 124.0000 | 180.0000 | -0.031200 |
| 44 | HP51 | HC | E | 43 | 42 | 40 | 1.0900 | 109.5000 | 60.0000  | 0.063200  |
| 45 | HP52 | HC | E | 43 | 42 | 40 | 1.0900 | 109.5000 | 300.0000 | 0.063200  |
| 46 | CBB  | CT | 3 | 43 | 42 | 40 | 1.5400 | 111.0000 | 180.0000 | -0.192400 |
| 47 | HP53 | HC | E | 46 | 43 | 42 | 1.0900 | 109.5000 | 60.0000  | 0.027200  |
| 48 | HP54 | HC | E | 46 | 43 | 42 | 1.0900 | 109.5000 | 300.0000 | 0.027200  |
| 49 | CGB  | C  | B | 46 | 43 | 42 | 1.5270 | 109.4000 | 180.0000 | 0.908600  |
| 50 | O1B  | O2 | E | 49 | 46 | 43 | 1.2600 | 117.2000 | 90.0000  | -0.846300 |
| 51 | O2B  | O2 | E | 49 | 46 | 43 | 1.2600 | 117.2000 | 270.0000 | -0.846300 |
| 52 | C2B  | CB | B | 42 | 40 | 38 | 1.4100 | 107.0000 | 180.0000 | -0.259800 |
| 53 | CMB  | CT | 3 | 52 | 42 | 40 | 1.5100 | 125.0000 | 0.0000   | -0.032900 |
| 54 | HM11 | HC | E | 53 | 43 | 42 | 1.0900 | 109.5000 | 60.0000  | 0.042700  |
| 55 | HM12 | HC | E | 53 | 52 | 42 | 1.0900 | 109.5000 | 180.0000 | 0.042700  |
| 56 | HM13 | HC | E | 53 | 52 | 42 | 1.0900 | 109.5000 | 300.0000 | 0.042700  |
| 57 | C4B  | CC | S | 52 | 42 | 40 | 1.4100 | 107.0000 | 0.0000   | 0.421900  |
| 58 | CHC  | CD | B | 53 | 52 | 42 | 1.3700 | 127.0000 | 180.0000 | -0.029600 |
| 59 | HAM  | HC | E | 58 | 57 | 52 | 1.0800 | 120.0000 | 0.0000   | 0.145000  |
| 60 | C1C  | CC | B | 58 | 57 | 52 | 1.3700 | 130.0000 | 180.0000 | 0.051600  |
| 61 | NC   | NP | E | 60 | 58 | 57 | 1.3800 | 124.0000 | 0.0000   | -0.449300 |
| 62 | C3C  | CB | B | 60 | 58 | 57 | 1.4100 | 127.0000 | 180.0000 | -0.067000 |
| 63 | CAC  | CY | B | 62 | 60 | 58 | 1.5100 | 124.0000 | 180.0000 | -0.108000 |
| 64 | HV4  | HC | E | 63 | 62 | 60 | 1.0800 | 120.0000 | 0.0000   | 0.122000  |
| 66 | CBC  | CX | B | 63 | 62 | 60 | 1.5400 | 111.0000 | 180.0000 | -0.211000 |
| 67 | HVC4 | HC | E | 66 | 63 | 62 | 1.0800 | 120.0000 | 0.0000   | 0.116500  |
| 68 | HVT4 | HC | E | 66 | 63 | 62 | 1.0800 | 120.0000 | 180.0000 | 0.116500  |

|    |      |    |   |    |    |    |        |          |          |           |
|----|------|----|---|----|----|----|--------|----------|----------|-----------|
| 72 | C2C  | CB | B | 62 | 60 | 58 | 1.4100 | 107.0000 | 180.0000 | -0.202800 |
| 73 | CMC  | CT | 3 | 72 | 62 | 60 | 1.5100 | 125.0000 | 0.0000   | -0.039900 |
| 74 | HM31 | HC | E | 73 | 63 | 62 | 1.0900 | 109.5000 | 60.0000  | 0.045700  |
| 75 | HM32 | HC | E | 73 | 72 | 62 | 1.0900 | 109.5000 | 180.0000 | 0.045700  |
| 76 | HM33 | HC | E | 73 | 72 | 62 | 1.0900 | 109.5000 | 300.0000 | 0.045700  |
| 77 | C4C  | CC | S | 72 | 62 | 60 | 1.4100 | 107.0000 | 0.0000   | 0.394900  |
| 78 | CHD  | CD | B | 73 | 72 | 62 | 1.3700 | 127.0000 | 180.0000 | -0.070600 |
| 79 | HBM  | HC | E | 78 | 77 | 72 | 1.0800 | 120.0000 | 0.0000   | 0.166000  |
| 80 | C1D  | CC | B | 78 | 77 | 72 | 1.3700 | 130.0000 | 180.0000 | 0.110600  |
| 81 | ND   | NO | E | 80 | 78 | 77 | 1.3800 | 124.0000 | 0.0000   | -0.459300 |
| 82 | C2D  | CB | B | 80 | 78 | 77 | 1.4100 | 127.0000 | 180.0000 | 0.052800  |
| 83 | CMD  | CT | 3 | 82 | 80 | 78 | 1.5100 | 125.0000 | 0.0000   | -0.122900 |
| 84 | HM51 | HC | E | 83 | 82 | 80 | 1.0900 | 109.5000 | 60.0000  | 0.106367  |
| 85 | HM52 | HC | E | 83 | 82 | 80 | 1.0900 | 109.5000 | 180.0000 | 0.106367  |
| 86 | HM53 | HC | E | 83 | 82 | 80 | 1.0900 | 109.5000 | 300.0000 | 0.106367  |
| 87 | C3D  | CB | B | 82 | 80 | 78 | 1.4100 | 107.0000 | 180.0000 | -0.196800 |
| 88 | C4D  | CC | S | 87 | 82 | 80 | 1.4100 | 107.0000 | 0.0000   | 0.699900  |
| 89 | CHA  | CD | S | 88 | 87 | 82 | 1.3700 | 127.0000 | 180.0000 | -0.227600 |
| 90 | HGM  | HC | E | 89 | 88 | 87 | 1.0800 | 120.0000 | 0.0000   | 0.286000  |
| 91 | CAD  | CT | 3 | 87 | 82 | 80 | 1.5100 | 124.0000 | 180.0000 | -0.033200 |
| 92 | HP61 | HC | E | 91 | 87 | 82 | 1.0900 | 109.5000 | 60.0000  | 0.081200  |
| 93 | HP62 | HC | E | 91 | 87 | 82 | 1.0900 | 109.5000 | 300.0000 | 0.081200  |
| 94 | CBD  | CT | 3 | 91 | 87 | 82 | 1.5400 | 111.0000 | 180.0000 | -0.191400 |
| 95 | HP63 | HC | E | 94 | 91 | 87 | 1.0900 | 109.5000 | 60.0000  | 0.048700  |
| 96 | HP64 | HC | E | 94 | 91 | 87 | 1.0900 | 109.5000 | 300.0000 | 0.048700  |
| 97 | CGD  | C  | B | 94 | 91 | 87 | 1.5300 | 109.4000 | 180.0000 | 0.893600  |
| 98 | O1D  | O2 | E | 97 | 94 | 91 | 1.2600 | 117.2000 | 90.0000  | -0.852800 |
| 99 | O2D  | O2 | E | 97 | 94 | 91 | 1.2600 | 117.2000 | 270.0000 | -0.852800 |

LOOP EXPLICIT

NA C4A  
 FE NB  
 FE NC  
 FE ND  
 NB C4B  
 NC C4C  
 ND C4D  
 C1A CHA

IMPROPER

NA C1A C4A FE

|     |     |     |     |
|-----|-----|-----|-----|
| NB  | C1B | C4B | FE  |
| NC  | C1C | C4C | FE  |
| ND  | C1D | C4D | FE  |
| C1A | C2A | NA  | CHA |
| C1B | C2B | NB  | CHB |
| C1C | C2C | NC  | CHC |
| C1D | C2D | ND  | CHD |
| C2A | C3A | C1A | CAA |
| C2B | C3B | C1B | CMB |
| C2C | C3C | C1C | CMC |
| C2D | C3D | C1D | CMD |
| C3A | C4A | C2A | CMA |
| C3B | C4B | C2B | CAB |
| C3C | C4C | C2C | CAC |
| C3D | C4D | C2D | CAD |
| C4A | NA  | C3A | CHB |
| C4B | NB  | C3B | CHC |
| C4C | NC  | C3C | CHD |
| C4D | ND  | C3D | CHA |

DONE

STOP

**Table S1.** Components of the MM-PBSA free energies (kcal·mol<sup>-1</sup>) for the FM1, FM2, FM3, FM4 and FM5 models.

| Model                | FM1    | FM2     | FM3     | FM4     | FM5     |
|----------------------|--------|---------|---------|---------|---------|
| $\Delta E_{ele}$     | 1.11   | -116.94 | -114.32 | -94.72  | -131.38 |
| $\Delta E_{vdw}$     | -55.02 | -55.93  | -54.19  | -51.24  | -57.79  |
| $\Delta E_{int}$     | 1.94   | 1.71    | 1.99    | 1.85    | 1.73    |
| $\Delta G_{np/solv}$ | -7.87  | -8.14   | -8.72   | -8.24   | -8.72   |
| $\Delta G_{pb/solv}$ | -32.78 | 55.91   | 47.62   | 30.51   | 69.25   |
| $\Delta G_{solv}$    | -40.65 | 47.77   | 38.90   | 22.27   | 60.54   |
| $\Delta G_{np}$      | -62.89 | -64.07  | -62.91  | -59.48  | -66.51  |
| $\Delta G_{pb}$      | -31.67 | -61.03  | -66.70  | -64.21  | -62.12  |
| $\Delta H_{binding}$ | -92.61 | -123.39 | -127.62 | -121.83 | -126.90 |
| $T\Delta S$          | -47.42 | -53.78  | -50.19  | -49.07  | -52.05  |
| $\Delta G_{binding}$ | -45.19 | -69.61  | -77.43  | -72.76  | -74.85  |

$$\Delta G_{np} = \Delta E_{vdw} + \Delta G_{np/solv}, \Delta G_{pb} = \Delta E_{ele} + \Delta G_{pb/solv}$$

$$\Delta H_{binding} = \Delta G_{np} + \Delta G_{pb} + \Delta E_{int}$$

$$\Delta G_{binding} = \Delta H - T\Delta S$$

**Table S2.** Occupancies (%) of hydrogen bonds and salt bridges between coproheme and active center for FM1, FM2, FM3, FM4 and FM5 models.

| Active Site | Residue       | FM1   | FM2   | FM3   | FM4   | FM5   |
|-------------|---------------|-------|-------|-------|-------|-------|
| P2          | Tyr145        | 87.58 | 97.58 | 97.94 | /     | 97.98 |
|             | Arg218 (Salt) | /     | 100.0 | 99.60 | /     | 100.0 |
|             | Ser223        | 72.94 | /     | 94.24 | 29.26 | /     |
| P4          | Lys149 (Salt) | /     | 36.62 | 95.24 | /     | 63.48 |
|             | Ser112        | 83.36 | 95.54 | 99.00 | /     | 89.80 |
| P6          | Tyr114        | /     | /     | 90.16 | 98.64 | /     |
| P7          | Arg131 (Salt) | /     | /     | 75.64 | 75.56 | 64.96 |
|             | Gln185        | 25.90 | /     | 87.90 | 90.08 | 58.52 |

**Table S3.** Normal-Coordinate structural decomposition of haredroheme during the rotation process of wild-type and Lys149Ala mutant.

|           | Basis | Doop | B2u  | B1u   | A2u   | Eg(x) | Eg(y) | A1u   |
|-----------|-------|------|------|-------|-------|-------|-------|-------|
| WT        | min   | 0.81 | 0.38 | 0.31  | 0.30  | 0.09  | 0.35  | 0.44  |
|           | max   | 1.16 | 1.10 | 0.16  | 0.11  | 0.13  | 0.20  | 0.22  |
|           | delta | 0.36 | 0.72 | -0.14 | -0.18 | 0.05  | -0.15 | -0.22 |
| Lys149Ala | min   | 0.75 | 0.11 | 0.62  | 0.28  | 0.23  | 0.14  | 0.13  |
|           | max   | 1.63 | 1.59 | 0.03  | 0.22  | 0.06  | 0.15  | 0.18  |
|           | delta | 0.88 | 1.48 | -0.59 | -0.07 | -0.17 | 0.02  | 0.05  |

**Table S4.** Energetic change of enthalpy and entropy (kcal·mol<sup>-1</sup>) by MM-PBSA of different reorientation process at each peak point.

|            | <b>Harderoheme<br/>clockwise</b> | <b>Harderoheme<br/>anticlockwise</b> | <b>Lys149Ala<br/>clockwise</b> | <b>Heme<br/>clockwise</b> | <b>Harderoheme<br/>releasing</b> | <b>Heme<br/>releasing</b> |
|------------|----------------------------------|--------------------------------------|--------------------------------|---------------------------|----------------------------------|---------------------------|
| <i>ΔH</i>  | 19.06                            | 63.62                                | 56.19                          | 50.21                     | 63.63                            | 20.04                     |
| <i>TΔS</i> | 4.03                             | 10.76                                | 6.54                           | 19.42                     | 18.05                            | 1.69                      |
| <i>ΔG</i>  | 15.03                            | 52.86                                | 49.65                          | 30.79                     | 45.58                            | 18.35                     |

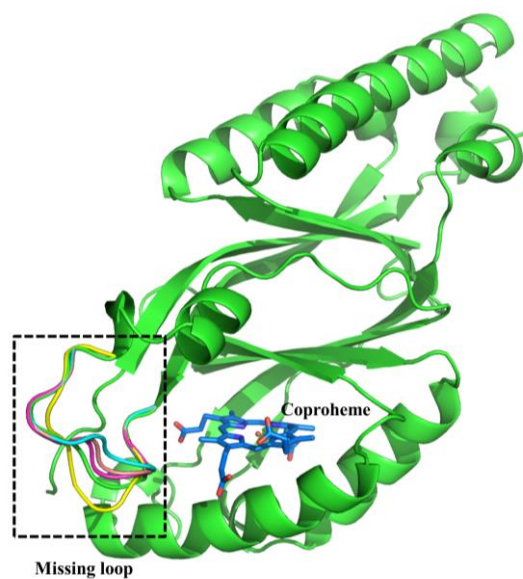

**Figure S1.** Initial model of five plausible completed chains by Modeller. The structures of FM1 (green), FM2 (cyan), FM3 (magenta), FM4 (yellow) and FM5 (wheat) were shown in cartoon.

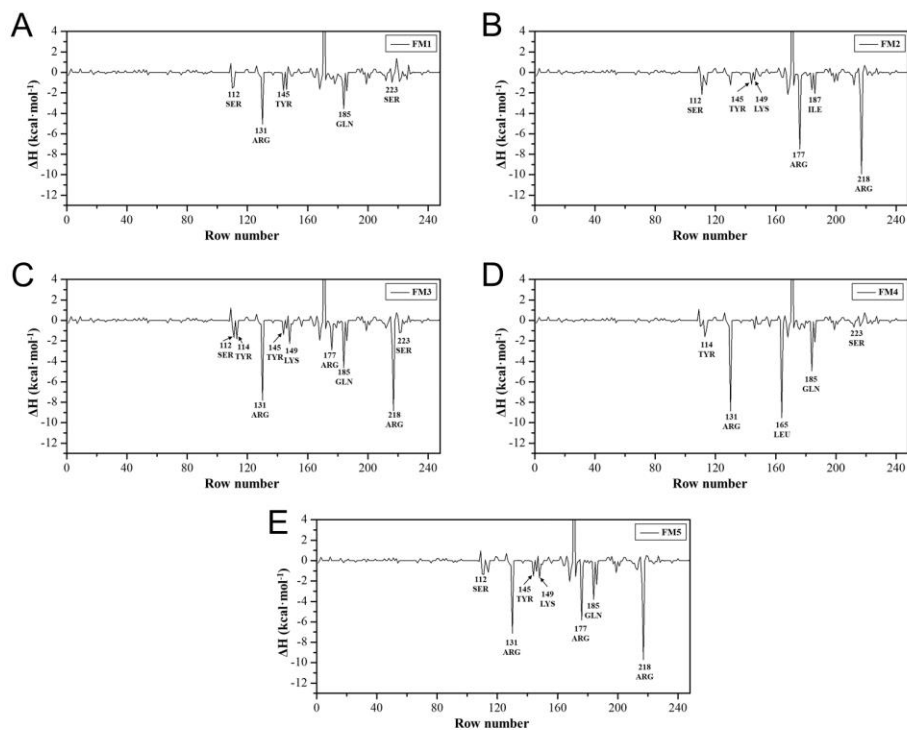

**Figure S2.** MM-PBSA energy decompositions representing (kcal·mol<sup>-1</sup>) into the residues from FM1 to FM5 for five monomer models.

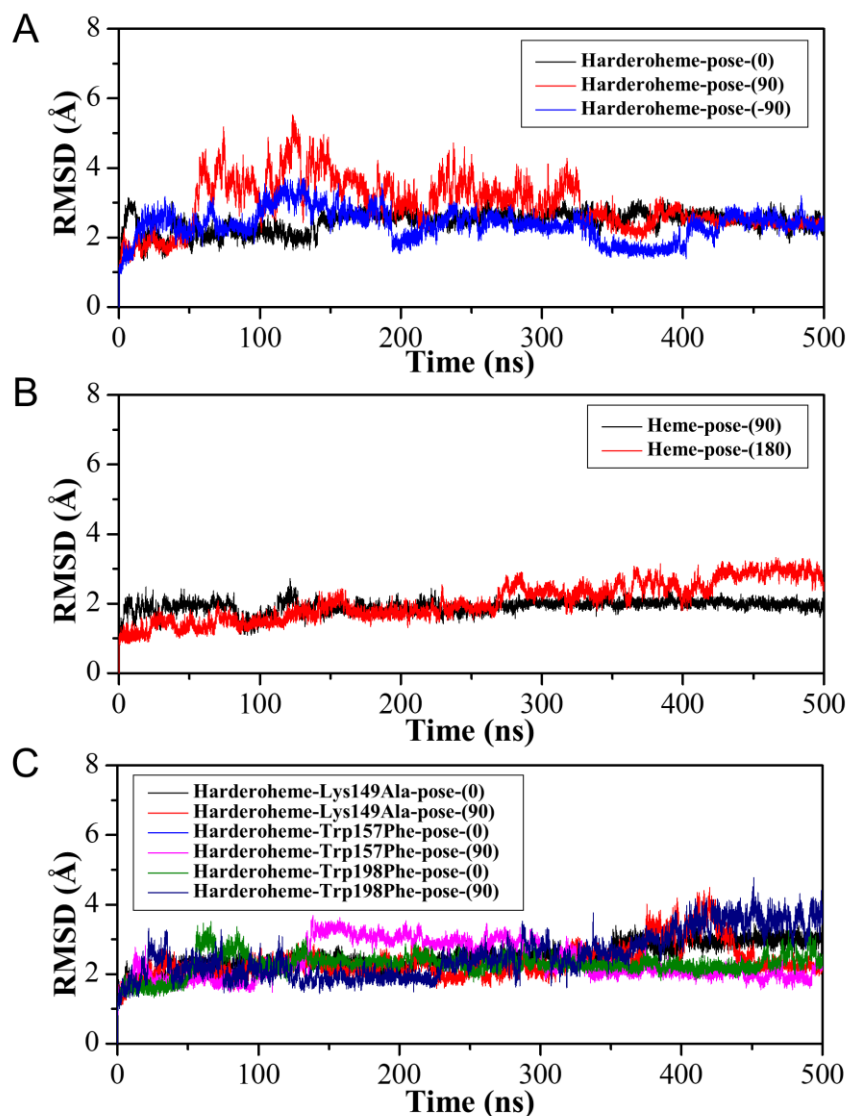

**Figure S3.** Root mean square deviation (RMSD) values of heavy atoms with respect to the initial structure of the TMD system: (A) Harderoheme-pose-(0) model in black line, Harderoheme-pose-(90) model in red line and Harderoheme-pose-(-90) model in blue line; (B) Heme-pose-(90) model in black line and Heme-pose-(180) in red line; (C) Harderoheme-Lys149Ala-pose-(0) model in black line, Harderoheme-Lys149Ala-pose-(90) model in red line, Harderoheme-Trp157Phe-pose-(0) model in blue line, Harderoheme-Trp157Phe-pose-(90) in magenta line, Harderoheme-Trp198Phe-pose-(0) model in green line and Harderoheme-Trp198Phe-pose-(90) model in deep blue line.

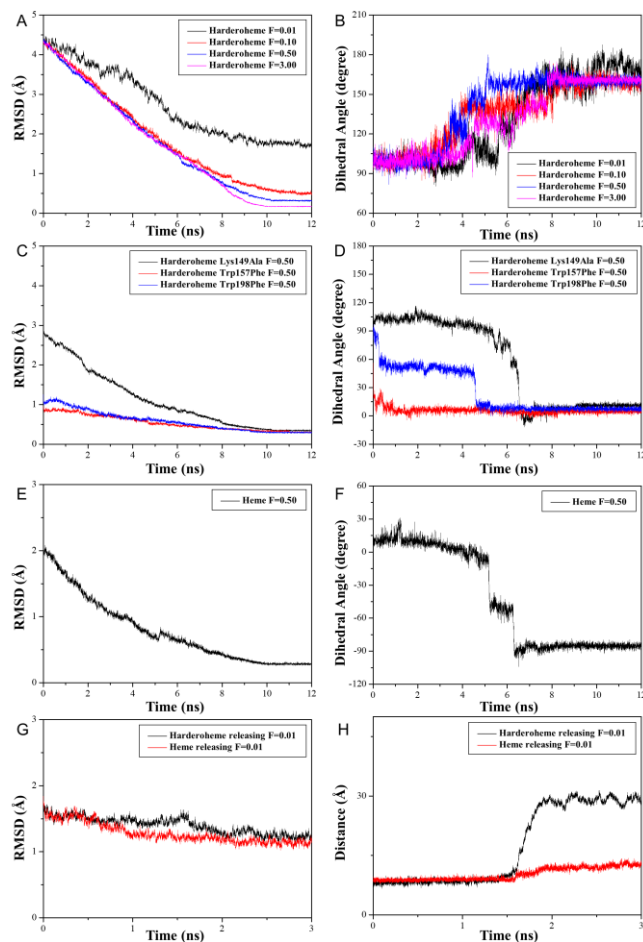

**Figure S4.** Root mean square deviation (RMSD) values of all backbone atoms and dihedral angle of  $C_{a, sub-p4^-}$

$Fe_{sub-} N_d, His171- O_h, Tyr145$  from each targeted molecular dynamics (TMD) simulations corresponding by using different harmonic force constant of different process. (A) harderoheme anti-clockwise rotation process of harmonic force constant of 0.01 kcal/ (mol·Å²) in black, 0.10 kcal/ (mol·Å²) in red, 0.50 kcal/ (mol·Å²) in blue and 3.00 kcal/ (mol·Å²) in magenta; (C) Lys149Ala clockwise rotation process of harmonic force constant of 0.50cal/ (mol·Å²) in black, Trp157Phe clockwise rotation process of harmonic force constant of 0.50cal/ (mol·Å²) in red and Trp198Phe clockwise rotation process of harmonic force constant of 0.50cal/ (mol·Å²) in blue; (E) Heme clockwise rotation process of harmonic force constant of 0.50 kcal/ (mol·Å²) in black. (G) Harderoheme releasing process of harmonic force constant of 0.01 lcal/ (mol·Å²) in red and Heme releasing process of harmonic force constant of 0.01 cal/ (mol·Å²) in red. The dihedral angle of  $C_{a, sub-p4^-}$   $Fe_{sub-} N_d, His171- O_h, Tyr145$  of harderoheme clockwise rotation process.

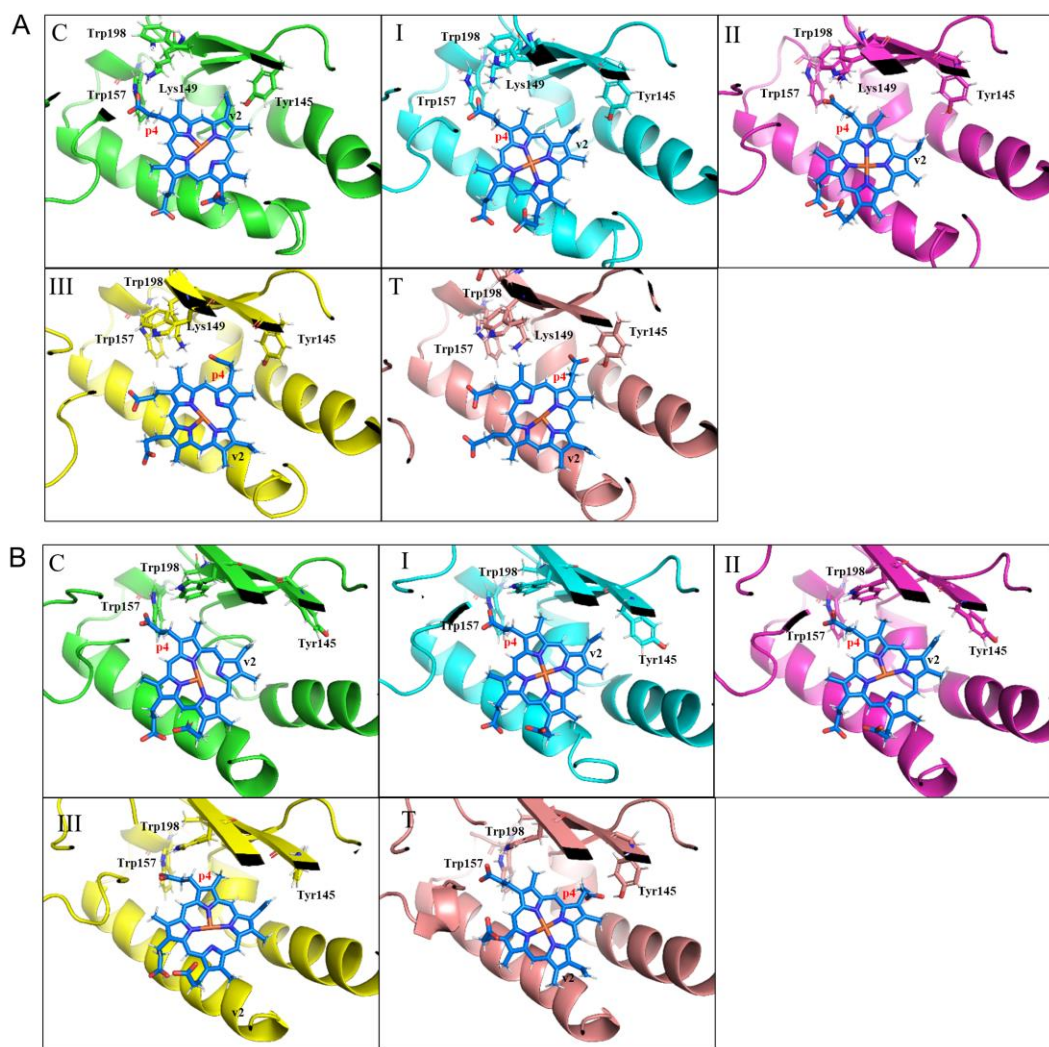

**Figure S5.** Top view of active site structures rotation process. Structure snapshots were shown in the corresponding color of each stage: (A) The current stage of WT model in green, stage I of WT model in cyan, stage II of WT model in magenta, stage III of WT model in yellow and the target stage of WT model in wheat cartoon; (B) The current stage of Lys149Ala model in green, stage I of Lys149Ala model in cyan, stage II of Lys149Ala model in magenta, stage III of Lys149Ala model in yellow and the target stage of Lys149Ala model in wheat.

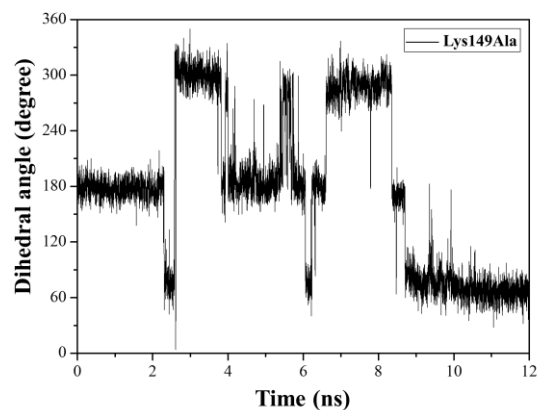

**Figure S6.** Dihedral angle of  $C_{\gamma}$ - $C_{\delta}$ - $C_{\epsilon}$ - $C_{\zeta}$  of Lys149 side-chain of the Lys149Ala mutant system.

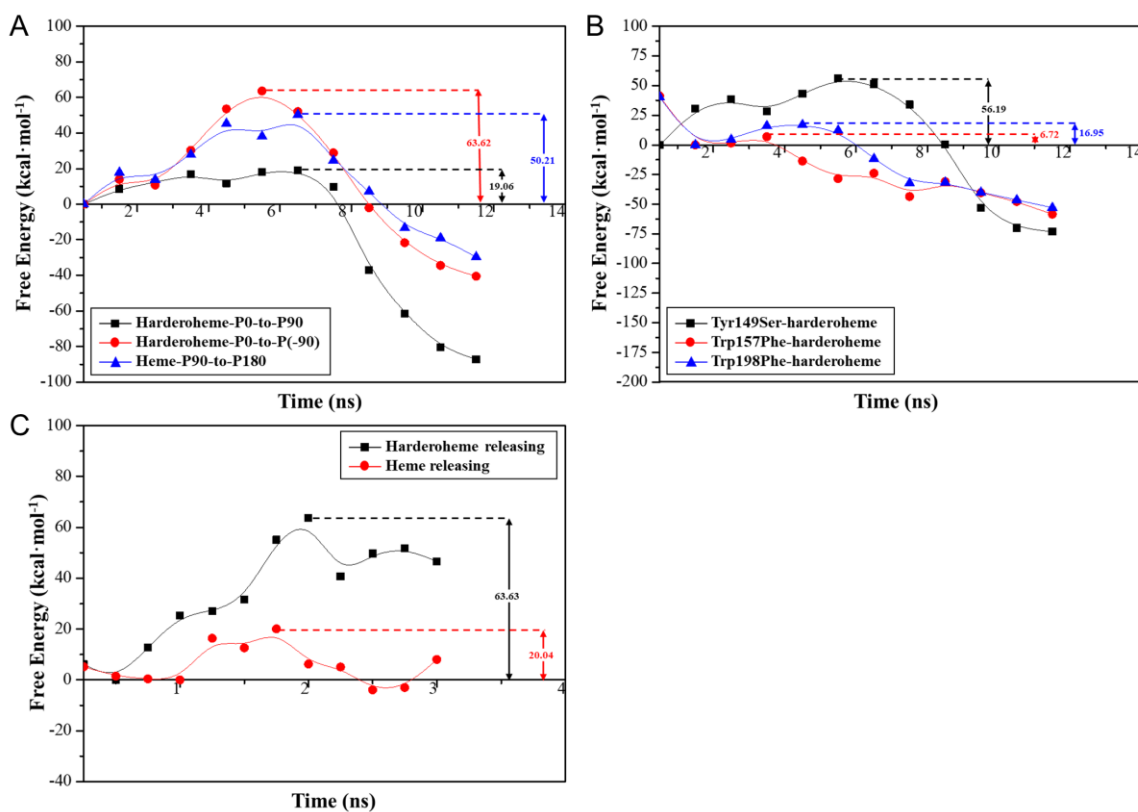

**Figure S7.** The calculated energy curve of enthalpy by MM-PBSA approach of (A) Harderoheme clockwise rotation process in black, Harderoheme anti-clockwise rotation process in red and Heme clockwise rotation process in blue; (B) Lys149Ala mutant clockwise rotation process in black, Trp157Phe mutant clockwise rotation process in black and Trp198Phe mutant clockwise rotation process in black; (C) Harderoheme releasing process and Heme releasing process.

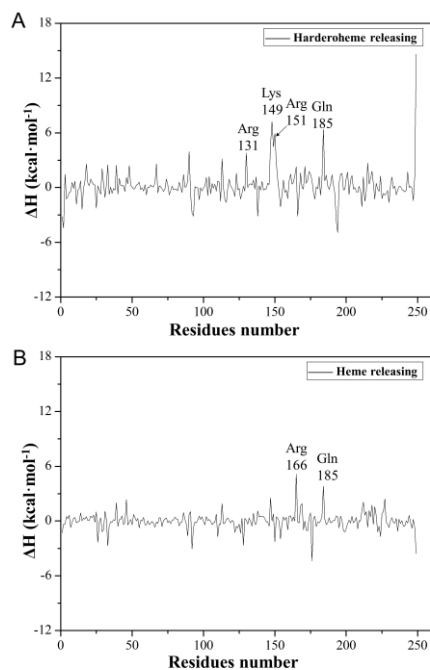

**Figure S8.** MM-PBSA energy decompositions of barriers into residues for different stages revealed by the TMD simulations harderoheme releasing process and (B) heme releasing process.

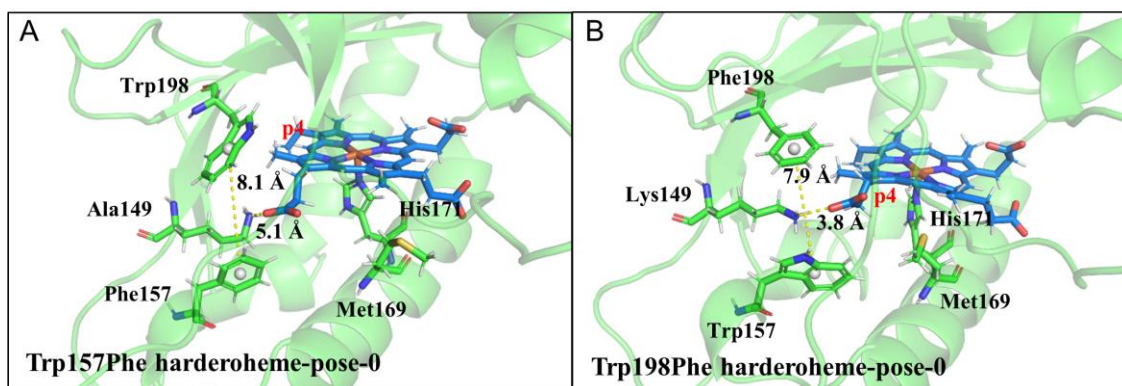

**Figure S9.** The structures after MD simulations of (A) Trp157Phe mutant of harderoheme-pose-0 and (B) Trp198Phe mutant of harderoheme-pose-0. Key distances among Trp-Lys-Trp portal and the substrate are shown.

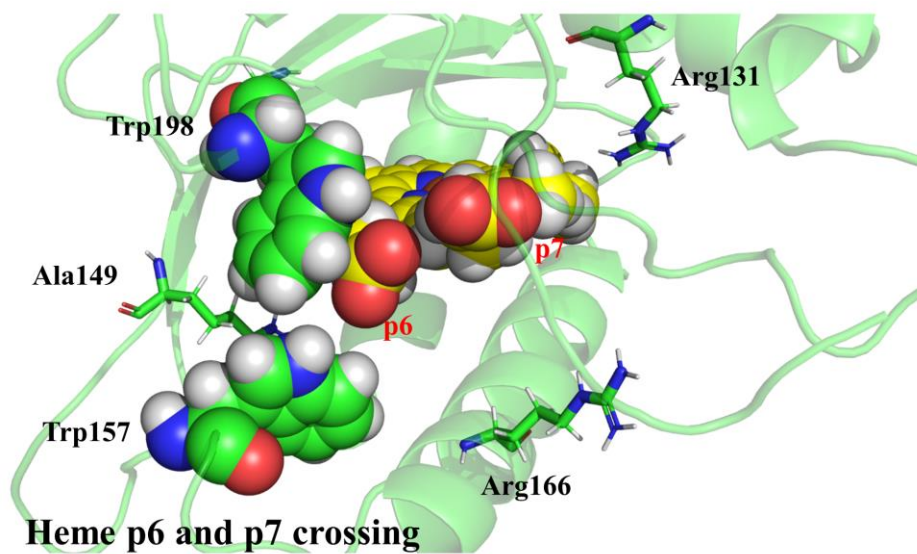

**Figure S10.** Representative active site structures at p4 crossing through the Trp157 and Trp198 residue of the harderoheme rotation process.

## References

- [1] Li, Chaoqun, *et al.* DNA structural distortions induced by a monofunctional trinuclear platinum complex with various cross-links using molecular dynamics simulation. *Journal of Chemical Information and Modeling*, 2020, 60(3): 1700-1708.
- [2] Izaguirre, Jesus A., *et al.* Langevin stabilization of molecular dynamics. *The Journal of chemical physics*, 2001, 114(5): 2090-2098.
- [3] Berendsen, Herman JC, *et al.* Molecular dynamics with coupling to an external bath. *The Journal of chemical physics*, 1984, 81(8): 3684-3690.
- [4]. Ulrich E. *et al.* A smooth particle mesh Ewald method. *Int. J. Chem. Phys.*, 1998, **103**, 8577.
- [5]. Miyamoto, S. & Kollman, P. A. Settle: An analytical version of the SHAKE and RATTLE algorithm for rigid water models. *J. Comput. Chem.*, 1992, **13**, 952-962.
- [6]. Celis AI, Gauss GH, Streit BR, Shisler K, Moraski GC, Rodgers KR *et al.* Structure-Based Mechanism for Oxidative Decarboxylation Reactions Mediated by Amino Acids and Heme Propionates in Coproheme Decarboxylase (HemQ). *J Am Chem Soc* 2017;139(5):1900–11.
- [7]. Gohlke, H., Kiel, C. & Case, D. A. Insights into Protein–Protein Binding by Binding Free Energy Calculation and Free Energy Decomposition for the Ras–Raf and Ras–RalGDS Complexes. *J. Mol. Biol.*, 2003, **330**, 891-913.
- [8] Peherstorfer, Sandra, *et al.* Insights into mechanism and functional consequences of heme binding to hemolysin-activating lysine acyltransferase HlyC from *Escherichia coli*. *Biochimica et Biophysica Acta (BBA)-General Subjects*, 2018: 1862(9): 1964-1972
- [9] Wißbrock, Amelie, *et al.* Structural insights into heme binding to IL-36 $\alpha$  proinflammatory cytokine. *Scientific reports*, 2019, 9(1): 1-14.
- [10] Hou, Xuben, *et al.* How to improve docking accuracy of AutoDock4. 2: a case study using different electrostatic potentials. *Journal of chemical information and modeling*, 2013, 53(1): 188-200.
